# Supplementary material for: Aberrant Otx2 Expression Enhances Migration and Induces Ectopic Proliferation of Hindbrain Neuronal Progenitor Cells
Source: PubMed Central journal article supplement (PMC3338642; doi:10.1371/journal.pone.0036211), 2012-04-27

## A Targeting Strategy

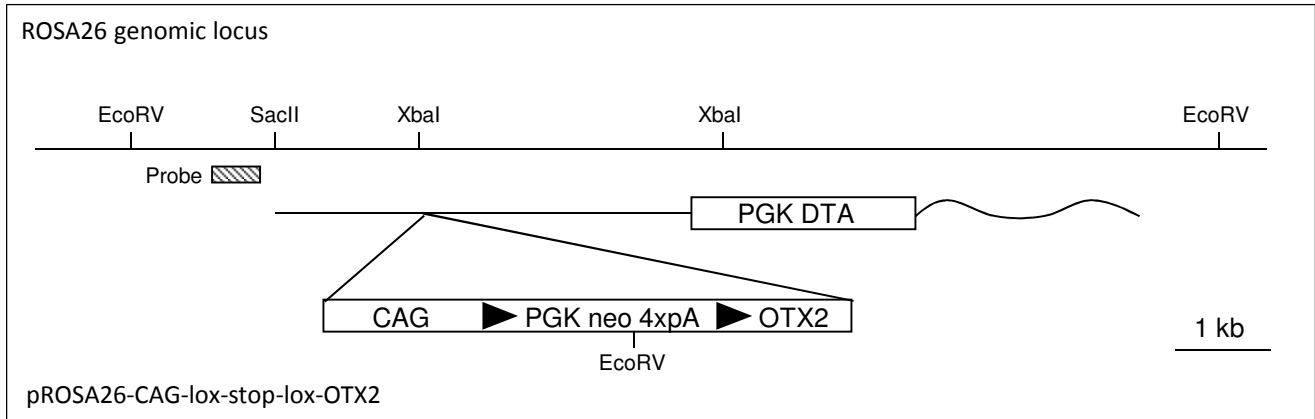

## B Southern Blot of ES Cell Clones

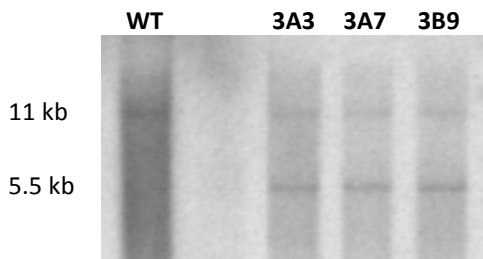

## C OTX2 induction in ES Cells

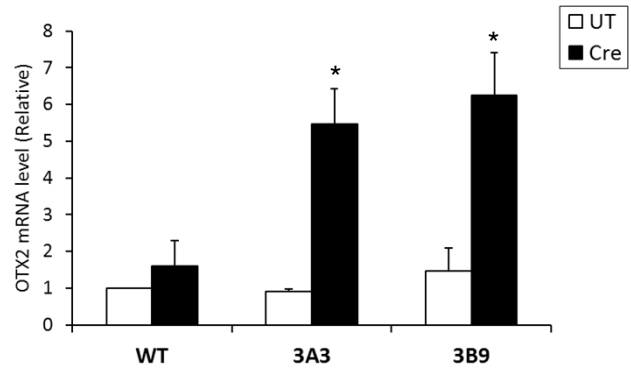

## D OTX2 induction in whole cerebellum

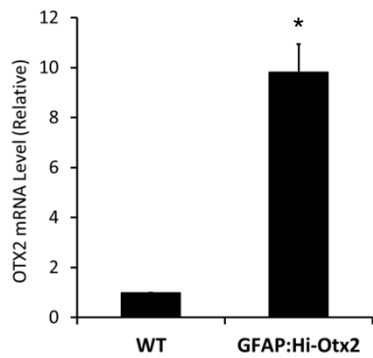

Supplement: pone.0036211.s001.pdf [file pone.0036211.s001.pdf]
