# Supplementary material for: Aberrant Otx2 Expression Enhances Migration and Induces Ectopic Proliferation of Hindbrain Neuronal Progenitor Cells
Source: PubMed Central journal article supplement (PMC3338642; doi:10.1371/journal.pone.0036211), 2012-04-27

Cerebellar Ectopia

Granule Neurons

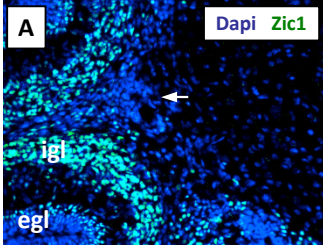

GABAergic Precursors

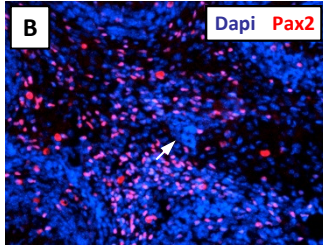

Oligodendrocytes

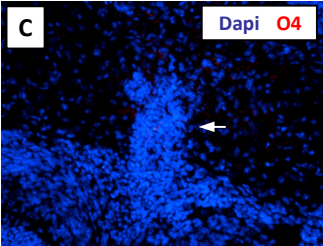

Astrocytes

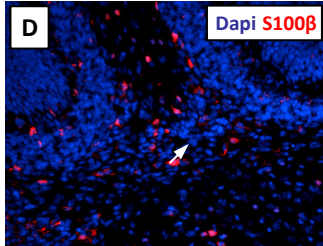

Bergmann Glia/Stem Cells

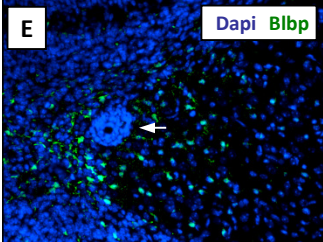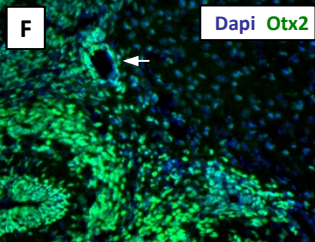

Brainstem Ectopia

Postmitotic Neurons

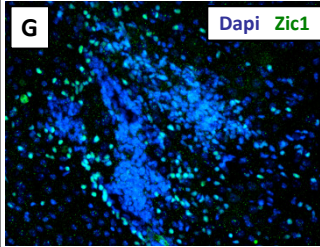

GABAergic Precursors

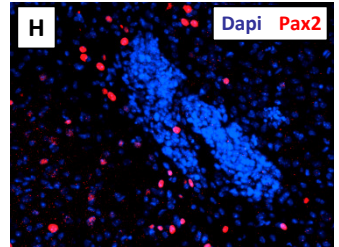

Oligodendrocytes

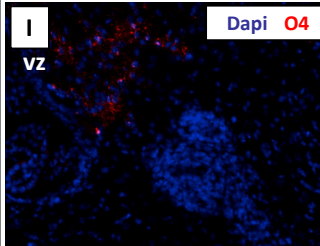

Astrocytes

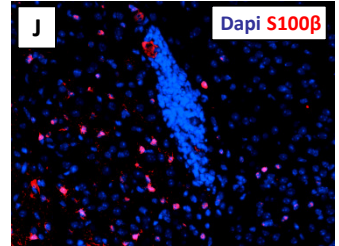

Bergmann Glia/Stem Cells

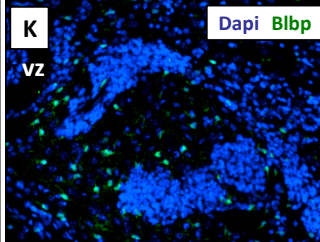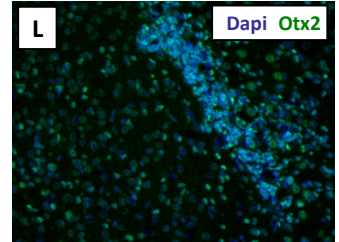

Supplement: pone.0036211.s004.pdf [file pone.0036211.s004.pdf]
