# Supplementary material for: Aberrant Otx2 Expression Enhances Migration and Induces Ectopic Proliferation of Hindbrain Neuronal Progenitor Cells
Source: PubMed Central journal article supplement (PMC3338642; doi:10.1371/journal.pone.0036211), 2012-04-27

**Brainstem Ectopia**

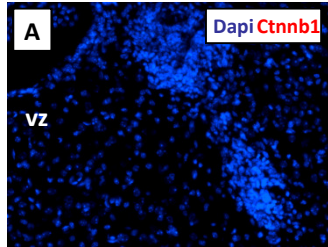

**White Matter Ectopia**

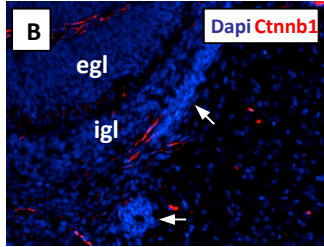

**Positive antibody control**

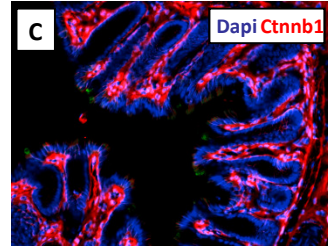

Supplement: pone.0036211.s005.pdf [file pone.0036211.s005.pdf]
